# Supplementary material
Source: PubMed Central journal article supplement (PMC5447480)
Supplement: NIHMS852169-supplement-supplement_1.pdf [file NIHMS852169-supplement-supplement_1.pdf]

*Supplementary Table 1: Menopausal hormone therapy use and risk of incident fecal incontinence – full model*

| <b>Covariate</b>                                                     | <b>Multivariate-adjusted HRs (95% CI)<sup>a</sup></b> |
|----------------------------------------------------------------------|-------------------------------------------------------|
| MHT use status (compared to never users)                             |                                                       |
| Current                                                              | 1.32 (1.20-1.45)                                      |
| Past MHT use                                                         | 1.26 (1.18-1.34)                                      |
| Race (compared to white women)                                       |                                                       |
| Black                                                                | 0.82 (0.64-1.06)                                      |
| Other                                                                | 1.15 (1.03-1.28)                                      |
| Age at menopause (compared to $\geq 53$ years old)                   |                                                       |
| <44 years old                                                        | 1.11 (0.99-1.24)                                      |
| 44-46 years old                                                      | 1.08 (0.97-1.20)                                      |
| 47-49 years old                                                      | 1.05 (0.95-1.16)                                      |
| 50-52 years old                                                      | 1.00 (0.93-1.08)                                      |
| BMI, kg/m <sup>2</sup> (compared to 20-24.9)                         |                                                       |
| <20                                                                  | 1.13 (1.03-1.24)                                      |
| 25-29.9                                                              | 1.00 (0.94-1.06)                                      |
| $\geq 30$                                                            | 1.09 (1.02-1.17)                                      |
| Leisure time exercise (compared <4 METs <sup>a</sup> )               |                                                       |
| 4-7 METs                                                             | 0.92 (0.84-1.00)                                      |
| $\geq 8$ METs                                                        | 0.88 (0.83-0.93)                                      |
| Smoking status (compared to never smokers)                           |                                                       |
| Past                                                                 | 1.01 (0.96-1.06)                                      |
| Current                                                              | 1.13 (1.01-1.27)                                      |
| Age at menarche (compared to 12 years old)                           |                                                       |
| $\leq 10$ years old                                                  | 1.04 (0.93-1.17)                                      |
| 11 years old                                                         | 1.01 (0.94-1.09)                                      |
| 13 years old                                                         | 1.03 (0.97-1.10)                                      |
| $\geq 14$ years old                                                  | 1.05 (0.98-1.13)                                      |
| Ever used oral contraceptives (compared to never users)              | 1.07 (1.01-1.13)                                      |
| Parity (compared to nulliparous women)                               |                                                       |
| 1                                                                    | 1.23 (1.06-1.43)                                      |
| 2                                                                    | 1.30 (1.14-1.47)                                      |
| 3+                                                                   | 1.41 (1.25-1.59)                                      |
| Surgical/radiation-induced menopause (compared to natural menopause) | 1.10 (1.04-1.17)                                      |
| Diabetes mellitus                                                    | 1.40 (1.31-1.51)                                      |
| Hypertension                                                         | 1.09 (1.04-1.15)                                      |
| Neurologic disease <sup>b</sup>                                      | 1.69 (1.51-1.90)                                      |
| History of cholecystectomy                                           | 1.23 (1.16-1.31)                                      |
| Total number of years working night shifts                           | 1.01 (0.99-1.02)                                      |

<sup>a</sup>. MET= metabolic equivalent of task

<sup>b</sup>. Defined as a confirmed diagnosis of amyotrophic lateral sclerosis, multiple sclerosis, or Parkinson's disease
